# Supplementary material for: Alterations in gene expression in Caenorhabditis elegans associated with organophosphate pesticide intoxication and recovery
Source: PubMed Central journal article supplement (PMC3760450; doi:10.1186/1471-2164-14-291), 2013-04-30
Supplement: 1471-2164-14-291-S4.pdf [file 1471-2164-14-291-S4.pdf]

**Developmentally Regulated Genes Whose Timing of Expression  
is Unaffected by Dichlorvos-induced Developmental Delays**

| <b>Oligo_set</b> | <b>WBGeneID</b> | <b>Gene</b> | <b>Name</b>            |
|------------------|-----------------|-------------|------------------------|
| 192458_at        | WBGene00000002  | aat-1       | Amino Acid Transporter |
| 174095_at        | WBGene00015484  | C05D11.7    |                        |
| 174170_at        | WBGene00015484  | C05D11.7    |                        |
| 174896_at        | WBGene00007593  | C14H10.3    |                        |
| 184919_s_at      | WBGene00017992  | F32E10.5    |                        |
| 182110_at        | WBGene00018829  | F54E7.6     |                        |
| 185731_at        | WBGene00019112  | F59E11.6    |                        |
| 184953_at        | WBGene00013755  | fbxa-115    | F-box A protein        |
| 181521_at        | WBGene00017904  | lim-8       | LIM domain family      |
| 174319_at        | WBGene00016955  | perm-5      | PERMeable eggshell     |
| 180355_at        | WBGene00016955  | perm-5      | PERMeable eggshell     |
| 181621_at        | WBGene00012002  | T24H10.4    |                        |
| 192032_s_at      | WBGene00015168  | tag-320     |                        |
| 174566_s_at      | WBGene00012221  | W03C9.5     |                        |
| 180920_s_at      | WBGene00014194  | ZK1037.6    |                        |

o
